# 1 **Localization and Functional Characterization of the Alternative** 2 **Oxidase in *Naegleria***

3

4 Running title: *Naegleria gruberi*'s AOX

5

6 Diego Cantoni<sup>a,1</sup>, Ashley Osborne<sup>a,1</sup>, Najwa Taib<sup>b,c</sup>, Gary Thompson<sup>d</sup>, Eleanna Kazana<sup>a</sup>, Elizabeth  
7 Edrich<sup>e</sup>, Ian R. Brown<sup>f</sup>, Simonetta Gribaldo<sup>b</sup>, Campbell W Gourlay<sup>e</sup>, and Anastasios D. Tsaousis<sup>a</sup>

8

9 <sup>a</sup> Laboratory of Molecular & Evolutionary Parasitology, RAPID group, School of Biosciences,  
10 University of Kent, Canterbury, CT2 7NJ, UK

11 <sup>b</sup> Unit Evolutionary Biology of the Microbial Cell, Department of Microbiology, Institut Pasteur,  
12 UMR CNRS 2001, Paris, France.

13

14 <sup>c</sup> Hub Bioinformatics and Biostatistics, Department of Computational Biology, Institut Pasteur, USR  
15 3756 CNRS, Paris, France.

16

17 <sup>d</sup> NMR facility, School of Biosciences, University of Kent, Canterbury CT2 7NJ, UK.

18

19 <sup>e</sup> Kent Fungal Group, RAPID group, School of Biosciences, University of Kent, Canterbury CT2  
20 7NJ, UK.

21

22 <sup>f</sup> Bioimaging Facility, School of Biosciences, University of Kent, Canterbury, CT2 7NJ, UK

23

24

25 <sup>1</sup>Equal contribution

26

## 27 **\* Correspondence:**

28 Dr. Anastasios D. Tsaousis, RAPID group, School of Biosciences, University of Kent, Canterbury,  
29 Kent, UK, Telephone number: +44 1227 827007; email: [A.Tsaousis@kent.ac.uk](mailto:A.Tsaousis@kent.ac.uk) /  
30 [tsaousis.anastasios@gmail.com](mailto:tsaousis.anastasios@gmail.com)

31

32

## 33 **Keywords**

34 *Naegleria*, Respiration; mitochondria; confocal microscopy; evolution; adaptation

35

36

37

38

39

40

41

42

43

44

45

46

47 **ABSTRACT**

48  
49 The Alternative oxidase (AOX) is a protein involved in maintaining the Krebs cycle in instances  
50 where the respiratory chain has been inhibited, while allowing for the maintenance of cell growth  
51 and necessary metabolic processes for survival. Among eukaryotes, alternative oxidases have  
52 disperse distribution and are found in plants, fungi and a few protists, including *Naegleria* ssp.  
53 *Naegleria* species are free-living unicellular amoeboflagellates, and include the pathogenic species  
54 of *N. fowleri*, the so-called brain eating amoeba. Using a multidisciplinary approach, we aimed to  
55 understand the evolution, localization and function of AOX and the role that plays in *Naegleria*'s  
56 biology. Our analyses suggest that the protein was present in last common ancestor of the genus and  
57 structure prediction showed that all functional residues are also present in *Naegleria* species. Using  
58 a combination of cellular and biochemical techniques, we also functionally characterize *N. gruberi*'s  
59 AOX in its mitochondria and we demonstrate that its inactivation affects its proliferation.  
60 Consequently, we discuss the benefits of the presence of this protein in *Naegleria* species, along  
61 with its potential pathogenicity role in *N. fowleri*. We predict that our findings will spearhead new  
62 explorations to understand the cell biology, metabolism and evolution of *Naegleria* and other free-  
63 living relatives.

64  
65  
66  
67  
68  
69  
70  
71  
72  
73  
74  
75  
76  
77  
78  
79  
80  
81  
82  
83  
84  
85  
86  
87  
88  
89  
90  
91  
92  
93

94 **INTRODUCTION**

95

96 *Naegleria gruberi* is a free-living, heterotrophic, microbial eukaryote and a close relative of  
97 *N. fowleri*, the so-called “brain-eating amoeba”. It is a non-pathogenic member of the excavate  
98 supergroup, which contains key pathogens such as Kinetoplastids (*Trypanosoma*, *Leishmania*),  
99 *Giardia* and *Trichomonas*, and is evolutionarily distant from animals, fungi and plants (Adl *et al.*,  
100 2019). *Naegleria* resides primarily as an amoebic (trophozoite) form, but upon environmental  
101 stimuli can transform into a flagellate, synthesizing basal bodies and flagella *de novo*, or encyst to  
102 allow for dispersion (De Jonckheere *et al.*, 2001). It possesses all the major organelles deemed to be  
103 canonical for eukaryotes, including nucleus, mitochondria, peroxisomes (Fritz-Laylin *et al.*, 2010)  
104 and a Golgi (Herman *et al.*, 2018). This cellular complexity is reflected in the *N. gruberi* genome  
105 sequence (Fritz-Laylin *et al.*, 2010) found to encode an extensive complement of cellular machinery  
106 and was argued to be reflective of the ancient sophistication present in the last eukaryotic common  
107 ancestor (Koonin, 2010).

108

109 Found in soils and freshwater worldwide, *N. gruberi* can thrive in a wide range of osmotic  
110 and oxygenic conditions (De Jonckheere, 1979, 2014; Tysl *et al.*, 2016). It has the capacity for full  
111 aerobic and anaerobic metabolism, and was predicted to have assimilated unique biochemical  
112 adaptations both within and outside the mitochondria (Fritz-Laylin *et al.*, 2010, 2011; Ginger *et al.*,  
113 2010). Among those, only a handful of pathways have been localized and characterized, in the  
114 trophozoite stage of this microbial eukaryote. Some examples include the cytosolic localization and  
115 functional characterization of the [FeFe]-hydrogenase (Tsaousis *et al.*, 2014), the mitochondrial  
116 localization and functional characterization of ferritin (Mach *et al.*, 2018), and the oxygen-dependent  
117 metabolism of lipids (Bexkens *et al.*, 2018). While the last report provided a hint on the function of  
118 *Naegleria*’s alternative oxidase (AOX), a thorough investigation on this important oxygen-dependent  
119 enzyme is lacking.

120

121 The alternative oxidase (AOX) is a terminal oxidase typically involved in bypassing the  
122 electron transport chain in plant mitochondria, even though it has also been identified and localized  
123 in the mitochondria and related organelles of many non-related microbial eukaryotes including  
124 trypanosomes (Clarkson *et al.*, 1989), *Candida albicans* (Yan *et al.*, 2009), *Cryptosporidium*  
125 (Roberts *et al.*, 2004) and *Blastocystis* (Stechmann *et al.*, 2008; Tsaousis *et al.*, 2018). Due to its  
126 absence in humans, the protein is considered a potential drug target, and has been well studied in  
127 some of these pathogenic species (Shiba *et al.*, 2013; Tsaousis *et al.*, 2018; Duvenage, Munro and  
128 Gourlay, 2019). Despite the wide distribution and extensive research on this group of proteins, their  
129 overall physiological roles are still unclear (Moore and Albury, 2008). Intriguingly, it has been  
130 suggested that AOX may be involved in maintaining tricarboxylic acid cycle turnover under high  
131 cytosolic phosphorylation potential, stress tolerance (oxygen), and thermogenesis (Finnegan, Soole  
132 and Umbach, 2004; Moore *et al.*, 2013).

133

134 Herein, we employed a multiphasic approach to characterize the AOX of *N. gruberi*, while  
135 comparing it with both the *N. fowleri* and *N. lovaniensis* homologues and examining their origins.  
136 Upon structural characterization of all the counterparts, we generated a specific polyclonal antibody  
137 against *N. gruberi* AOX, with which we localized the protein in *N. gruberi*’s mitochondria using a  
138 combination of assorted cellular approaches. Experiments with high-resolution respirometry  
139 demonstrated that the *N. gruberi* homologue confers cyanide resistance. This study represents the  
140 first thorough characterization of AOX in *Naegleria* species, which could provide further

141 understanding into the biochemical adaptations of this peculiar and highly adaptable microbial  
142 eukaryote.

143

144

145

## 146 **MATERIALS AND METHODS**

147

### 148 **Bioinformatic Analysis**

149 The predicted amino acid sequences of the alternative oxidase homologues of *N. fowleri* and  
150 *N. lovaniensis* were obtained from Genbank (NCBI) using the following accession numbers;  
151 GCA\_008403515.1 (*N. fowleri*), GCA\_003324165.1 (*N. lovaniensis*). The amino acid sequence of  
152 the AOX from *N. gruberi* was obtained from uniprot (D2V4B2). The Phyre2 web portal for protein  
153 modelling, prediction and analysis was used in intensive mode (Kelley *et al.*, 2015) to derive the  
154 structure for *Ng*AOX. Structures were then downloaded and analyzed using PyMol. For sequence  
155 alignment Clustal Omega (Sievers *et al.*, 2011) was used, output was downloaded as fasta file and  
156 analyzed using Jalview 2.11.0 (Waterhouse *et al.*, 2009). Sequence identifiers for AOX alignments  
157 were: *Trypanosoma brucei brucei* (Q26710), *Cryptosporidium parvum* (Q6W3R4), yeast; *Candida*  
158 *albicans* (A0A1D8PEM4), plant; *Arabidopsis thaliana* (Q39219), and, fungi; *Neurospora crassa*  
159 (Q01355).

160

### 161 **Phylogenetic analysis**

162 Three local databanks of proteomes, representative of all diversity from eukaryotes, bacteria  
163 and proteobacteria were assembled from the National Center for Biotechnology Information  
164 (NCBI): 193 proteomes from Eukaryotes (one per genus); 1017 proteomes from Bacteria (3 per  
165 family) and 1082 proteomes from Proteobacteria (1 per genus). Homology searches were performed  
166 using HMMSEARCH, from the HMMER-3.1b2 package (Johnson, Eddy and Portugaly, 2010), with  
167 the option --cut\_ga to screen all the proteomes in the three databanks for the presence of AOX pfam  
168 domain (PF01786.17). All the hits were then manually curated in order to discard false positives.  
169 The remaining hits were aligned using MAFFT-v7.407 (Katoh and Standley, 2013) with the linsi  
170 option and trimmed with BMGE-1.1 (Criscuolo and Gribaldo, 2010) using the BLOSUM30  
171 substitution matrix to select unambiguously aligned positions. A maximum likelihood tree was then  
172 generated using IQTREE-1.6.12 (Nguyen *et al.*, 2015) under the TEST option with 1000 ultrafast  
173 bootstrap replicates.

174

### 175 **Cell Culture**

176 *N. gruberi* strain NEG-M (kindly provided by Lillian Fritz-Laylin, Biology Department,  
177 University of Massachusetts, Amherst, USA) was cultured in M7 media at 28 °C (Tsaousis *et al.*,  
178 2014). Cells were passaged every 3 to 5 days to prevent overconfluency.

179

### 180 **Antibody generation**

181 A 16 amino acids peptide (nh2- CMHRDYNHDMSDKHRA –conh2) was designed by  
182 Eurogentec based on the provide sequence of AOX of *Naegleria gruberi* (XP\_002672918) (see  
183 **Suppl Figure S2**). 5 mg of the peptide was coupled with the carrier protein KHL (Keyhole Limpet  
184 Hemocyanin) and was subsequently used to inoculate a rabbit (through the Eurogentec's speedy  
185 program) for antibody production. The antibody's affinity (Eurogentec; Peptide: 1911009, Rabbit  
186 237) was confirmed through ELISA.

187

## 188 **Cell Fractionation and western blots**

189 To separate organelles from cytosol, cell fractionation by centrifugation was carried out as  
190 previously described (Herman *et al.*, 2018). Lysates were mixed with 4x sample buffer and heated to  
191 95 °C for 10 minutes. Samples were then loaded in two tris-glycine gels for gel electrophoresis. One  
192 gel was subjected to Coomassie staining overnight and destained the following day to assess equal  
193 loading. The other gel was transferred to PVDF membrane using a trans-blot turbo transfer system  
194 according to manufacturer's protocol (Bio-rad). Membranes were blocked with 5% milk in TBS  
195 buffer containing 0.5% tween-20 for 1 hour at room temperature. Primary antibody staining was  
196 carried out overnight at 4 °C with the following antibody dilutions: anti-AOX 1:1000, and  
197 previously published antibodies anti-HydE 1:1000 and, SdhB 1:1000 (Tsaousis *et al.*, 2014).  
198 Membranes were washed four times with TBS-T for 5 minutes prior to secondary staining with  
199 HRP-conjugated goat anti-mouse and goat anti-rabbit antibodies (Invitrogen). For detection,  
200 membranes were incubated with ECL reagent (Bio-rad) for 30 seconds and imaged using syngene  
201 G:BOX imager. Membranes were stripped with mild stripping buffer composed of 13 mM glycine,  
202 3.5 mM sodium dodecyl sulfate, 1% tween-20, pH 2.2. PVDF membranes were washed twice for 10  
203 minutes in mild stripping buffer, followed by two washes in PBS for 5 minutes, and lastly two  
204 washes for 5 minutes with TBS-T, prior to blocking for the next immunoprobe.  
205

## 206 **Immunofluorescence Microscopy**

207 *N. gruberi* was seeded onto sterile poly-L-lysine treated glass coverslips in a 6-well plate and  
208 incubated overnight at 25 °C. The following day the cells were treated with 250 nM MitoTracker  
209 Red for 30 minutes. The media was then aspirated and cells were washed with 1x PBS, followed by  
210 fixation using 2% formaldehyde for 20 minutes. After fixation, 2% formaldehyde was removed and  
211 cells were permeabilised with 0.1% triton-X 100 for 10 minutes. After permeabilization cells were  
212 washed three times with 1x PBS and blocked using 3% bovine serum albumin in PBS for 1 hour.  
213 Primary antibody staining was carried out at room temperature for 1 hour with custom made AOX  
214 antibodies (Eurogentec; Peptide: 1911009, Rabbit 237), diluted to 1:1000. Secondary antibody  
215 staining was carried out for 1 hour in the dark using anti-Rabbit-IgG-Alexa 488. Slides were washed  
216 and mounted using Prolong Gold Antifade with DAPI. Laser Confocal Microscopy was carried out  
217 using the LSM 880 Laser Confocal with Airyscan by Zeiss. Laser sets used were 405, 488 and 594,  
218 with airyscan detector plate imaging for high resolution. Images were captured and analyzed using  
219 Zen software suite by Zeiss.  
220

## 221 **Immunoelectron Microscopy**

222 Samples were prepared as previously described (Herman *et al.*, 2018). Blocking of the  
223 samples was achieved via a 1 hour incubation in 2% BSA in PBS with 0.05% Tween 20. Primary  
224 antibody staining was performed by incubating AOX antibodies at 1:10, 1:50 and 1:100 dilutions for  
225 15 hours at 8 °C. The sample grids were then incubated for 30 minutes at room temperature, with  
226 the corresponding gold-conjugated secondary antibodies. Counter-staining was achieved by  
227 incubation with 4.5% uranyl acetate in PBS for 15 minutes and a 2-minute incubation in Reynold's  
228 lead citrate. The sample grids were imaged with a Jeol 1230 Transmission Electron Microscope  
229 operated at 80kV and images were captured with a Gatan One view digital camera.  
230

## 231 **High Resolution Respirometry**

232 Real time respirometry was monitored using an OROBOROS Oxygraph-2k with Clark  
233 polarographic oxygen electrodes and automatic titration-injection micropump. The chambers of the  
234 oxygraph were calibrated using 2 ml of M7 media without glucose for 20 minutes. *N. gruberi* cells

235 were seeded in the chamber at a density of 100,000 cells per ml. Respiration was monitored before  
236 and during drug additions. The drugs used to assess respiration were added in the following order; 1  
237 mM potassium cyanide, 5  $\mu$ M antimycin A and 1.5 mM salicylhydroxamic acid (SHAM). The  
238 experiment was then repeated with the drug additions in reverse order. Student-t test was used to  
239 determine significance.

240

### 241 **Cell Proliferation Assay**

242 *Naegleria* cells were seeded at a density of 2000 cells per well of a clear F-bottom 96 well  
243 plate and incubated in identical conditions as stated above. The plate was placed on a Juli™Stage  
244 live cell monitoring system, programmed to capture an image of each well every hour for 5 days. On  
245 day-2, wells were inoculated with concentrations of SHAM at 1 mM, 0.1 mM, 0.001 mM and, 0.001  
246 mM. Plates were then incubated for a further 3 days. At the end of the experiment the images were  
247 used to count cell numbers using ImageJ. Using an image with a scale bar, we used the grid function  
248 with a known area per square that was applied to all images taken at 0, 24, 48, 72, 96 and 120 hours.  
249 Using the cell counter function, we counted the number of cells in a grid square, and multiplied it to  
250 the surface area size of a F-bottom 96-well plate in order to estimate the total cell number per well.  
251 The experiment was completed with three biological replicates, whereby each biological replicate  
252 consisted of three technical replicates. Cell counts were graphed using GraphPad Prism 8.

253

254

255

## 256 **RESULTS**

257

### 258 **Phylogenetic analysis of alternative oxidase proteins**

259 We carried out an exhaustive search for AOX homologs in updated eukaryotic and bacterial  
260 databanks. As bacterial hits were mainly from proteobacteria, we also searched for AOX homologs  
261 in a proteobacteria databank with more diversity within this phylum. We identified 323 AOX  
262 homologs: 265 from 193 eukaryotic taxa, 56 from 1,082 proteobacterial taxa, and 2 from 896  
263 bacterial taxa (other than proteobacteria) (**Suppl table S1**).

264 Regarding the eukaryotic distribution, in addition to previously described groups Alveolata,  
265 Euglenozoa, Metazoa, Choanoflagellates, Stramenopiles, Fungi, Rhodophyta, Heterolobosea and  
266 Viridiplantae (Pennisi *et al.*, 2016), we identified AOX homologs in some eukaryotes that were not  
267 reported: Apusozoa, Amoebozoa, Filasterea, Haptophyceae and Rhizaria. No homologs were found  
268 in Kipferlia, Metamonada and Hexamitida (**Suppl Figure S1** and **Suppl table S1**). Bacterial hits  
269 were much less diversified, as they are restricted to alphaproteobacteria, betaproteobacteria and  
270 gammaproteobacteria. The other two hits belong to Bacteroidetes and the CPR (Candidate Phyla  
271 Radiation) and they probably correspond to transfers from proteobacterial taxa (**Suppl Figure S1**).  
272 Our phylogenetic analysis shows that AOX homologs of Metazoans (UFB=86%), Haptophyceae,  
273 Choanoflagellata (UFB=100%) and Heterolobosea (UFB= 100%; inset **Figure 1**) form distinct and  
274 monophyletic groups pointing toward the presence of an AOX in the ancestors of each group.  
275 Regarding bacterial sequences, although they branch together and form a monophyletic clade  
276 (UFB= 97%), it seems that proteobacterial taxa transferred AOX sequences to other bacteria  
277 (Bacteroidetes and CPR) and to some Euglenozoa. This bacterial clade forms a sister group of  
278 Streptophyta nad Rhodophyta (UFB= 97%), however, it is not clear which eukaryotic group  
279 transferred AOX sequences to proteobacteria.

280 The presence of the two separate and monophyletic groups Streptophyta (UFB= 100%),  
281 Chlorophyta (UFB=82%) shows that, although the presence of AOX could not be inferred in the

282 ancestor of Archaeplastida, it can be inferred in the ancestors of both groups. Finally, regarding  
283 Fungi, the presence of three separate and monophyletic groups containing Ascomycota and  
284 Basidiomycota (UFB= 80%), Chytridiomycota (UFB= 100%) and a mix of Zoopagomycota,  
285 Chytridiomycota, Cryptomycota, Mucoromycota, Blastocladiomycota and Microsporidia (UFB=  
286 74%), suggests that AOX was acquired at least three times independently in this group.  
287

### 288

### 289 **Amino acid alignments reveal conserved residues in *Naegleria gruberi*, *N. fowleri* and *N.***

### 290 ***lovaniensis***

291 The amino acid sequences of AOX in *N. gruberi*, *N. fowleri* and *N. lovaniensis*, were aligned  
292 against the AOX found in protists; *Trypanosoma brucei brucei*, *Cryptosporidium parvum*, yeast;  
293 *Candida albicans*, plant; *Arabidopsis thaliana* and, fungus; *Neurospora crassa*. The N-termini  
294 displayed little conservation. However, key conserved residues were detected across all species from  
295 the middle of the sequences, continuing towards the C-terminus (**Suppl. Figure S2**). Most of the  
296 conserved residues localized in the alpha helical arms, including the residues responsible for  
297 membrane interaction, diiron binding domain and, three universally conserved tyrosines (**Suppl**  
298 **Table S2**). The presence of these key features strongly suggests that *Naegleria*'s predicted AOX  
299 would retain functional activity.  
300

### 301 **Structure modelling of AOX from *Naegleria gruberi***

302 Using Phyre2, we were able to generate models of the *Ng*AOX monomer. The resulting  
303 model reveals a monomer containing the characteristic four-bundle helix, in which resides the active  
304 site (**Figure 2**). The active site is composed of the characteristic four glutamate residues and two  
305 histidine residues which are responsible for diiron binding. In addition, the universally conserved  
306 tyrosine residue necessary for activity is present at residue number 175. Furthermore, helices  $\alpha 1$  and  
307  $\alpha 4$  contains a strong hydrophobic region, also a key feature of AOX, as these helices are involved in  
308 membrane insertion. Amino acid conservation of glycine 85 and glycine 165 between all *Naegleria*  
309 species and *Trypanosoma* contribute to the structural kink of both  $\alpha 2$  and  $\alpha 5$  helices. We also  
310 observed conservation between amino acids responsible for membrane-binding regions and for  
311 dimerization (**Suppl Table S2**). These amino acid conservations highlight the conserved structure of  
312 AOX, its characteristic helices and hydrophobicity patch for membrane anchoring.  
313

### 314 **Localization of AOX in *N. gruberi***

315 To verify the presence and localization of AOX, fractionation by centrifugation was carried  
316 out to isolate the mitochondria and cytosol. Using a custom-made antibody raised against *N. gruberi*  
317 AOX, our western blot analysis reveals the presence of AOX in the mitochondrial fraction and not  
318 in the cytosolic fraction (**Figure 3C**) Successful fractionation was confirmed by immunoblotting  
319 Hydrogenase E protein, which localizes exclusively in the cytosol and succinate dehydrogenase, a  
320 previously confirmed mitochondrial marker (Tsaousis *et al.*, 2014). The localization of AOX was  
321 also carried out by immunofluorescent microscopy, whereby *N. gruberi* cells were stained with  
322 mitotracker red before fixation, and subsequently fixed and immunostained for detecting AOX. Our  
323 imaging reveals a high degree of colocalization between the mitotracker signal and the AOX signal  
324 derived from the secondary antibodies. This indicates that AOX is localized in the mitochondria  
325 (**Figure 3A & B & Suppl. Figure S3**). To further confirm these observations, we have subsequently  
326 carried out immunoelectron microscopy (IEM) on resin fixed *N. gruberi* sample grids. As a result,  
327 we detected positive signal inside derived from the immunogold labelling, strongly suggesting its  
328 localization is within the inner membrane of the mitochondria (**Figure 4**).

329

### 330 **Real time respirometry reveals AOX confers cyanide resistance**

331 In order to assess whether *N. gruberi* respire from either the classical respiratory chain or  
332 through AOX, real-time respirometry data was collected. Cells were cultured for three days and  
333 washed with M7 media without the addition of glucose. Afterwards, 2 ml of cell resuspension was  
334 seeded into the respirometer chambers at a density of  $10^5$  cells per ml. After establishing the routine  
335 respiration, a series of drugs were added sequentially to each chamber and oxygen flux was  
336 monitored (**Figure 5**). Initially, 1 mM of complex IV inhibitor potassium cyanide was injected into  
337 the chambers, revealing an increase in oxygen flux and decrease in oxygen concentration, which  
338 would suggest that respiration via alternative oxidase pathway is active, as the presence of cyanide  
339 has no effect on *N. gruberi*. The addition of complex III inhibitor, Antimycin A, had no effect on  
340 respiration. Lastly, addition of 1.5 mM of AOX inhibitor SHAM resulted in a significant decrease in  
341 respiration (**Figure 5A, B**). When the experiment was repeated with drug additions in the reverse  
342 order, the SHAM treatment resulted in a significant decrease in respiration, whereas Antimycin A  
343 and KCN had no further effects on respiration (**Figure 5B, C**). This would suggest that *N. gruberi*  
344 respire predominantly via the AOX pathway.

345

### 346 **The presence of SHAM in culture media reduces cellular proliferation**

347 Due to the decrease respiration in *N. gruberi* in the presence of SHAM, we opted to evaluate  
348 cell growth under varying concentrations of SHAM using a Juli™Stage live cell monitoring system  
349 (**Figure 6**). Cells were grown in 96-well culture plates for 48 hours to allow proliferation. At the 48  
350 hour mark, we pipetted varying amounts of SHAM in culture media to reach the following final  
351 concentrations; 1 mM, 0.1mM, 0.01 mM and, 0.001 mM. The plate was then returned to the  
352 incubator for another 72 hours. By counting the number of cells under each condition, we were able  
353 to verify the negative effect of SHAM on proliferation. Concentrations of SHAM at 1 mM to 0.1  
354 mM were effective at stopping cell proliferation altogether, whereas 0.01 mM SHAM greatly  
355 reduced cell proliferation. SHAM concentration of 0.001 mM had no effect on cell proliferation, as  
356 the cell counts followed a similar pattern to the negative control.

357

358

## 359 **DISCUSSION**

360

361 The genome of *Naegleria gruberi* (Fritz-Laylin *et al.*, 2010) encodes several homologues of  
362 alternative oxidases, but until now, there was no thorough report to investigate the origin and  
363 distribution of these proteins within microbial eukaryotes. Our sophisticated search and analyses  
364 suggest that the AOX gene was present in the ancestors of multiple eukaryotic groups, suggesting  
365 potential acquisition at earlier stages in the eukaryotic evolution. Specifically, for the *Naegleria*  
366 species, our phylogenetic analysis indicates that AOX gene duplication took place prior to  
367 speciation events, which further suggests the earlier requirement of two homologues as an  
368 adaptation to the unique lifestyles of these organisms. In *N. gruberi*, these homologues have been  
369 previously shown to be differentially expressed during the organism's two major stages, trophozoite  
370 and flagellate (<https://phycocosm.jgi.doe.gov/pages/blast-query.jsf?db=Naegr1>) (Fritz-Laylin *et al.*,  
371 2010). The reason behind this is currently unknown and no conclusions can be extracted from the  
372 primary amino acid sequences of the two homologues. Our sequence alignment analysis reveals that  
373 the key residues required for AOX to be functional are present across all homologues and all three  
374 *Naegleria* species. One of the key domains presented in the sequences is the diiron domain,  
375 characterized by four glutamic acid residues and two histidine residues involved in forming



376 hydrogen bonds with Fe<sup>2+</sup> and Fe<sup>1+</sup> ions, of which the latter are considered to be universally  
377 conserved (Moore *et al.*, 2013). In addition, our sequence alignment reveals the presence of the three  
378 universally conserved tyrosine residues (Moore *et al.*, 2013) in the electron transport chain (Moore  
379 *et al.*, 2013; Shiba *et al.*, 2013). Interestingly, our sequence alignment revealed a deviation in  
380 conservation of the residue trp-151 (*TbAOX*), including between the pathogenic *N. fowleri*, non-  
381 pathogenic *N. lovaniensis* and, *N. gruberi* species. It has previously been reported that a mutation  
382 from trp-206 (trp-151 on *tbAOX*) to ala-206 resulted in a decrease in respiration of 95% (Crichton *et*  
383 *al.*, 2010). However, wet lab experiments would be required to ascertain the effect of the difference  
384 in respiration found in *Naegleria* species.

385 Following up from the *in silico* analysis, we aimed to biochemically characterize the *N.*  
386 *gruberi* AOX homolog. It had been previously experimentally demonstrated that *N. gruberi*'s  
387 preferred food substrate are lipids over glucose, which was subsequently associated with the unique  
388 abundance of metabolites in the brain (Bexkens *et al.*, 2018). The authors demonstrated that *N.*  
389 *gruberi* has a biochemically active AOX, but they did not show any localization. We have designed  
390 a peptide and generated an anti-*Naegleria* polyclonal antibody that could cross-react with all  
391 *Naegleria* species and be used for localization studies. Our immunoblotting results show a strong  
392 band appearing at 28 kDa, which was the predicted mass of *N. gruberi*'s AOX. This signal only  
393 appeared in the whole cell lysate and mitochondrial fraction, with no signal in the cytosolic fraction.  
394 This data was strengthened by our immunofluorescent microscopy experiments, which revealed a  
395 high degree of colocalization between the AOX staining and a commercial mitochondrial stain  
396 (Tsaousis *et al.*, 2014). Lastly, an experiment using immunogold labelling showed staining signal  
397 from inside the mitochondria, which we find encouraging as AOX is located on the inner  
398 mitochondrial membrane (Berthold, Andersson and Nordlund, 2000).

399 Next, real-time respirometry data showed strong evidence of AOX being an active  
400 component in *N. gruberi*, since the addition of KCN did not lower the oxygen flux. Interestingly,  
401 previous work explored the potential cyanide resistance of *N. gruberi* as part of a larger  
402 metabolomic study (Bexkens *et al.*, 2018). The authors reported an 80% decrease in respiration,  
403 which contrasts with our results. The authors also reported that addition of SHAM further decreased  
404 respiration by 14%. The differences between the results reported here and the aforementioned study  
405 is likely to be attributed to the differing growth conditions or prolonged differential adaptations of  
406 the laboratory strains (Schuster, 2002). Nonetheless, our cellular and biochemical data confirm their  
407 hypothesis regarding the presence of AOX in *N. gruberi* mitochondria. This however leads to  
408 significant questions in the pursuit of elucidating the complex metabolic mechanisms in *N. gruberi*,  
409 in particular, which environmental conditions favor expression and utilization of AOX, there is no  
410 report demonstrating the endurance of *Naegleria* species under, for example, hypoxic conditions.  
411 *Naegleria* species favor warm and moist environments and have been isolated from lakes, rivers,  
412 geothermal springs along with man-made bodies of water such as swimming pools, thermal effluent,  
413 sewage sludge and water-cooling circuits from power station [for review see (Chalmers, 2014)]. As  
414 a result, *Naegleria* species seem to acclimatize in various temperatures, turbidities and metal  
415 concentrations, which subsequently affect the mitochondrial functions. In other organisms, mainly  
416 plants, AOX has been implicated in metabolic and signaling hemostasis and was demonstrated to be  
417 particularly important during a variety of stresses, including alterations in temperature, nutrient  
418 deficiency, oxygen levels and metal toxicity (Vanlerberghe, 2013a; Saha, Borovskii and Panda,  
419 2016). Such observations may be true for *Naegleria* as well, and further investigations using these  
420 different parameters are required to understand the true role of the various AOX homologs in  
421 *Naegleria*'s survival. For example, a previous report has shown differences between metabolic  
422 activities of iron-saturated and iron restricted trophozoites of *N. gruberi*, which could subsequently

423 be attributed to potential iron homeostasis centrally regulated by the mitochondria (Mach *et al.*,  
424 2018). Again, it will be interesting to further investigate the role and function of the AOX in such  
425 mechanisms.

426 While reviewing the adaptations of *Naegleria* in the various environments, we cannot avoid  
427 discussing the potential role of AOX in the pathogenesis of *N. fowleri*. A recently published ‘omics  
428 approach investigating the potential genes that could be driving the pathogenicity of *N. fowleri*  
429 demonstrated up-regulation of mitochondrial energy conversion genes including those involved in  
430 ubiquinone biosynthesis, isocitrate dehydrogenase (TCA cycle), complex I and complex III of  
431 oxidative phosphorylation (Herman *et al.*, 2020). While the authors have demonstrated up-  
432 regulation of enzymes indirectly involved in oxidative stress pathway (e.g. agmatine deiminase),  
433 they were not able to demonstrate any significant change in the expression levels of any of the *N.*  
434 *fowleri* AOX homologs (Herman *et al.*, 2020). Based on these observations, it would be interesting  
435 to investigate the expression levels of AOX from the amoebas collected directly from the brain,  
436 either through transcriptomics and /or proteomics, as well as investigate whether this protein is  
437 essential for the survival of *N. fowleri* in such a complicated and variable environment.

438 It has been observed that there are significant differences in concentration levels of  
439 metabolites between various brain regions (Cichocka and Bereś, 2018). *N. fowleri* is typically found  
440 in olfactory bulb of the brain (Moseman, 2020), which it has a unique metabolic network signature  
441 and is highly abundant in various salts (e.g. sodium, potassium, calcium), metals (e.g. iron, copper  
442 and magnesium) (Gardner *et al.*, 2017), metabolites (histidine-containing dipeptides such as  
443 anserine, carnosine, b-alanine), cholesterol, poly-unsaturated fatty acids and prostaglandins (Choi  
444 *et al.*, 2018), as well as featuring variable concentrations of oxygen (Özugur, Kunz and Straka, 2020).  
445 Differences in the concentrations of these factors have been previously shown to provide stimuli for  
446 alterations in the expression of AOX in plants (Vanlerberghe, 2013) and trypanosomes (Vassella *et*  
447 *al.*, 2004). As previously discussed, AOX was also shown to be implicated in metabolic and  
448 signaling hemostasis and was demonstrated to be particularly important during a variety of stresses,  
449 including alterations in temperature, nutrient deficiency, oxygen levels and metal toxicity (Saha,  
450 Borovskii and Panda, 2016). Additionally, it has been demonstrated that salt stress negatively  
451 impacts mitochondria function, resulting in decreased electron transport activities, with increased  
452 mitochondrial ROS and lipid peroxidation, followed by subsequent induction of mitochondrial  
453 ROS-scavenging systems, including increase activity of AOX (Ferreira *et al.*, 2008; Mhadhbi *et al.*,  
454 2013; Saha, Borovskii and Panda, 2016). We speculate that similar implications could be associated  
455 with the function of AOX in *N. fowleri* populating the brain. Demonstrating that anti-AOX drugs are  
456 effective against *Naegleria* growth, is of great importance to investigate whether these proteins are  
457 essential for the survival of *N. fowleri* in the brain, and determine if it is possible to efficiently  
458 utilize these compounds (Murphy and Lang-Unnasch, 1999; Ebiloma *et al.*, 2019; Barsottini *et al.*,  
459 2020) against the “brain-eating amoeba”.

460 Herein, we provide the first thorough investigation of the localization and functional  
461 characterization of the alternative oxidase proteins in *Naegleria* species. These single-protein-  
462 focused studies are essential in contributing to our understanding of the biochemical and cellular  
463 adaptations of this exceptional microbial eukaryote as well as provide another piece in *Naegleria*’s  
464 evolutionary puzzle. As a result, our investigation on the function of the AOX provides an  
465 additional step towards developing this organism as a model to understand various pan-eukaryotic  
466 adaptations and more importantly how metabolism could affect its opportunistic nature.

467  
468  
469

470

471 **ACKNOWLEDGEMENTS**

472 This research was supported by BBSRC research grant (BB/M009971/1) to ADT. EK was supported  
473 by a Betty and Gordon Moore Foundation grant to ADT.

474

475

476 **AUTHORS CONTRIBUTIONS**

477 D.C., A.O., S.G., C.W.G., and A.D.T. designed the experiments. D.C., A.O., N.T., E.K., I.R.B., and  
478 E.E. conducted the experiments. D.C., N.T. and G.T. performed the data analysis. D.C. and A.D.T.  
479 wrote the manuscript and all co-authors reviewed and approved it.

480

481

482

483

484

485

486

487 **FIGURE LEGENDS**

488

489

490

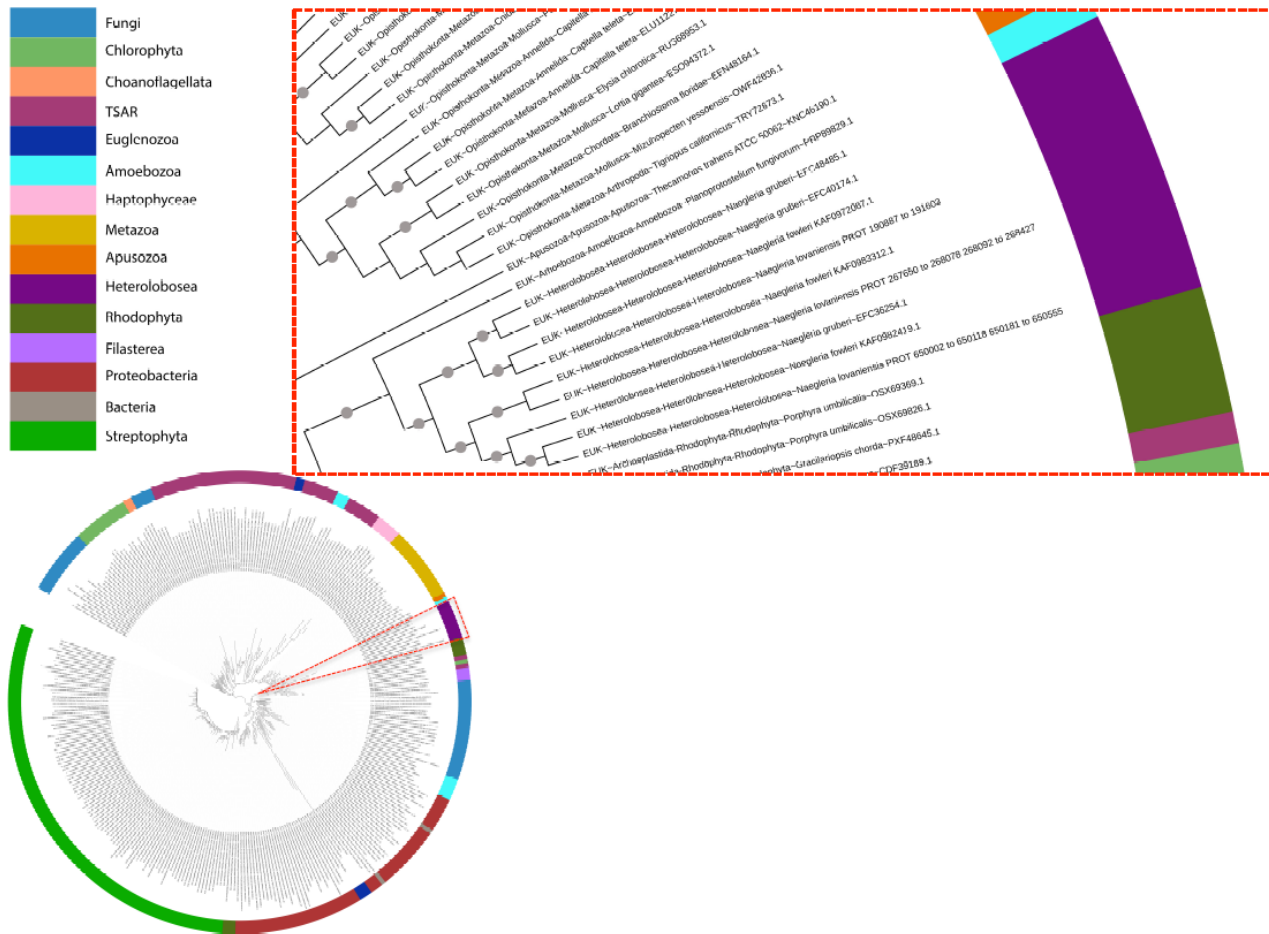

491 **Figure 1. Phylogenetic trees demonstrating the origin of alternative oxidases in heterobolosea.**  
492 Maximum likelihood tree of AOX homologs in eukaryotes and bacteria (323 sequences, 148 amino  
493 acid positions). The tree was inferred with IQTREE using the LG+I+G4 model selected under the  
494 BIC criterion. Grey dots correspond to supports higher than 80%. The scale bar corresponds to the  
495 average number of substitutions per site. Inset focus on the heterobolosean section of the tree,  
496 demonstrating the evolution and duplications events through the *Naegleria* genus. Full phylogenetic  
497 tree can be found in **Suppl. Figure S1**.

498  
499  
500  
501  
502  
503  
504  
505  
506  
507

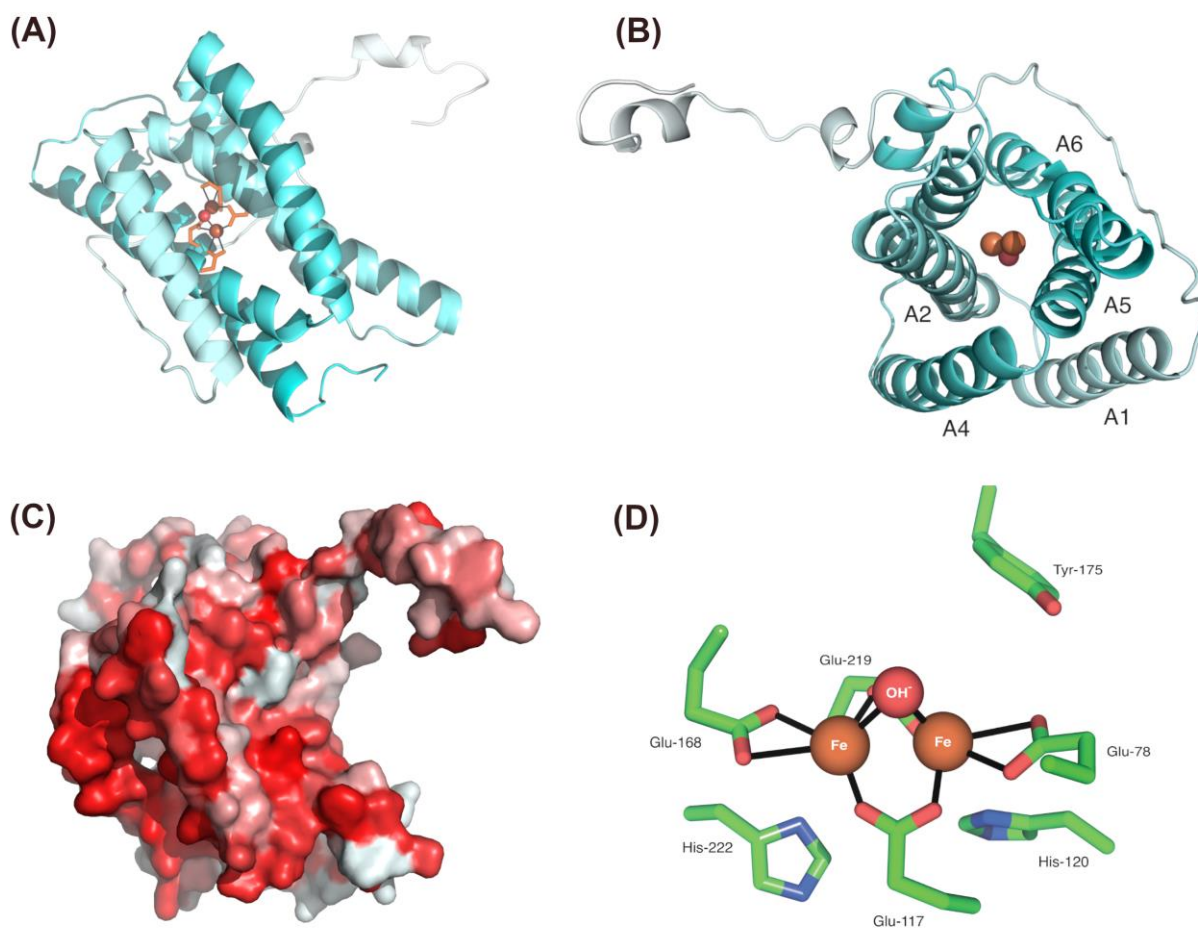

508 **Figure 2. Structural modelling of *N. gruberi* AOX reveals canonical features.**

509 Using Phyre2 we modelled the structure of ngAOX. We observed the presence of the di-iron domain  
510 and alpha-helical bundles, as viewed from the side (A) and top-down (B). Rendering the structure by  
511 hydrophobicity shows the typical hydrophobic patch required for membrane anchoring (C).

512  
513  
514  
515  
516  
517  
518  
519  
520  
521  
522  
523  
524  
525  
526

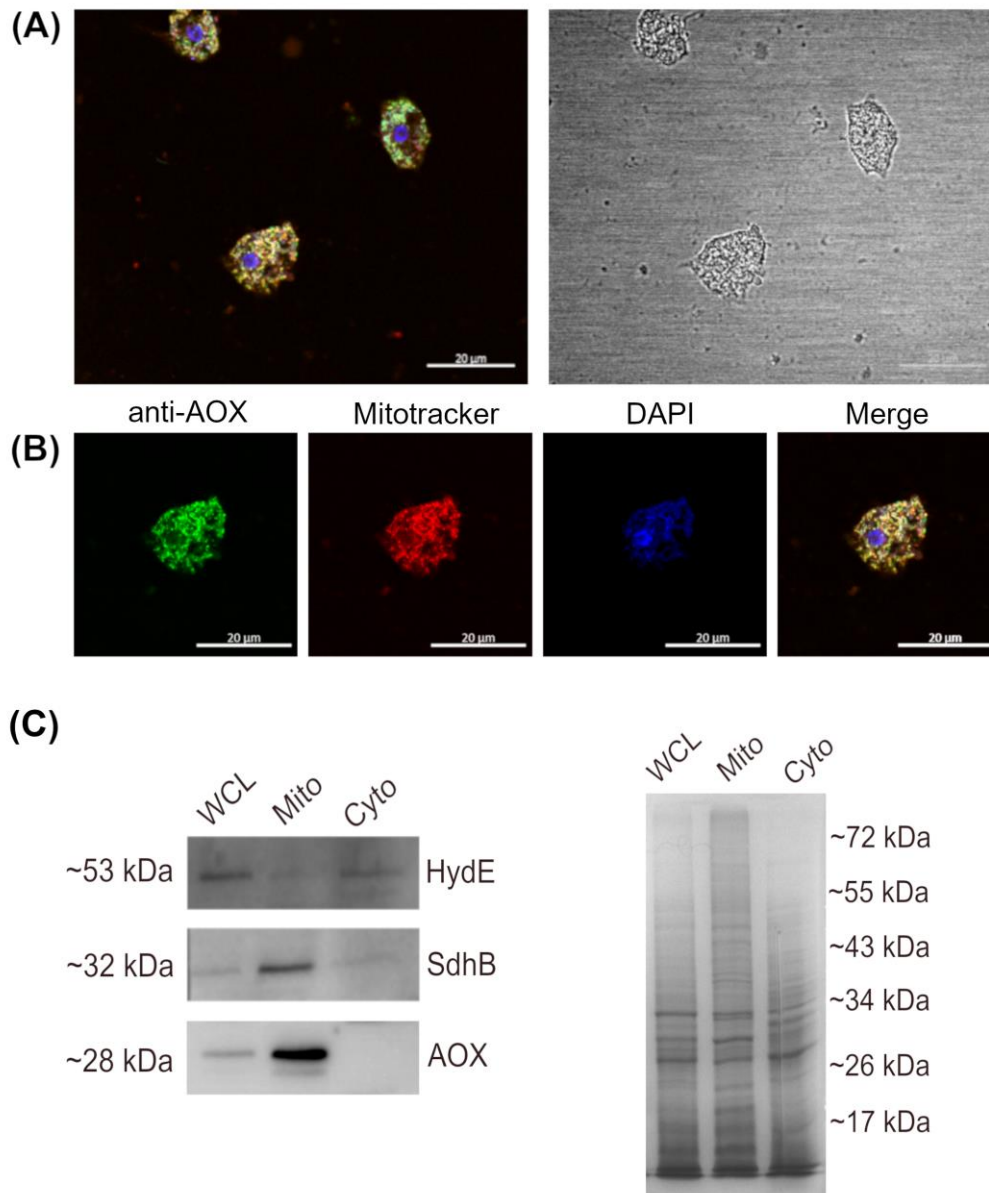

527 **Figure 3. Confocal microscopy and western blot reveals mitochondrial localization of AOX.**  
528 (A & B) *N. gruberi* cells were treated with mitotracker red prior to fixation and then probed with  
529 AOX antibodies (green). Nuclear marker and mtDNA staining is shown in blue (DAPI staining) Our  
530 confocal imaging reveals a high degree of co-localization between the mitotracker red signal and the  
531 green signal derived from immunoprobng AOX. These results provide visual confirmation of the  
532 expression of AOX and their localization in the mitochondria. Localization figures of more *N.*  
533 *gruberi* cells can be found in **Suppl. Figure S3**. For western blotting lysates were fractionated by  
534 centrifugation to yield samples containing pelleted mitochondrial fraction and a clarified cytosolic  
535 fraction. Successful fractionation from the whole cell lysate was confirmed by immunblotting (left-  
536 hand side) for hydrogenase maturase E (HydE) that localizes in the cytosol, and succinate  
537 dehydrogenase B (SdhB), which localizes exclusively in the mitochondria (C). Immunostaining  
538 against AOX revealed a band around ~28 kDa in the whole cell lysate and mitochondrial fraction  
539 only. A Coomassie stain was carried out to the parallel SDS-PAGE gel parallel to assess equal  
540 loading between samples (right-hand side).

541  
542  
543

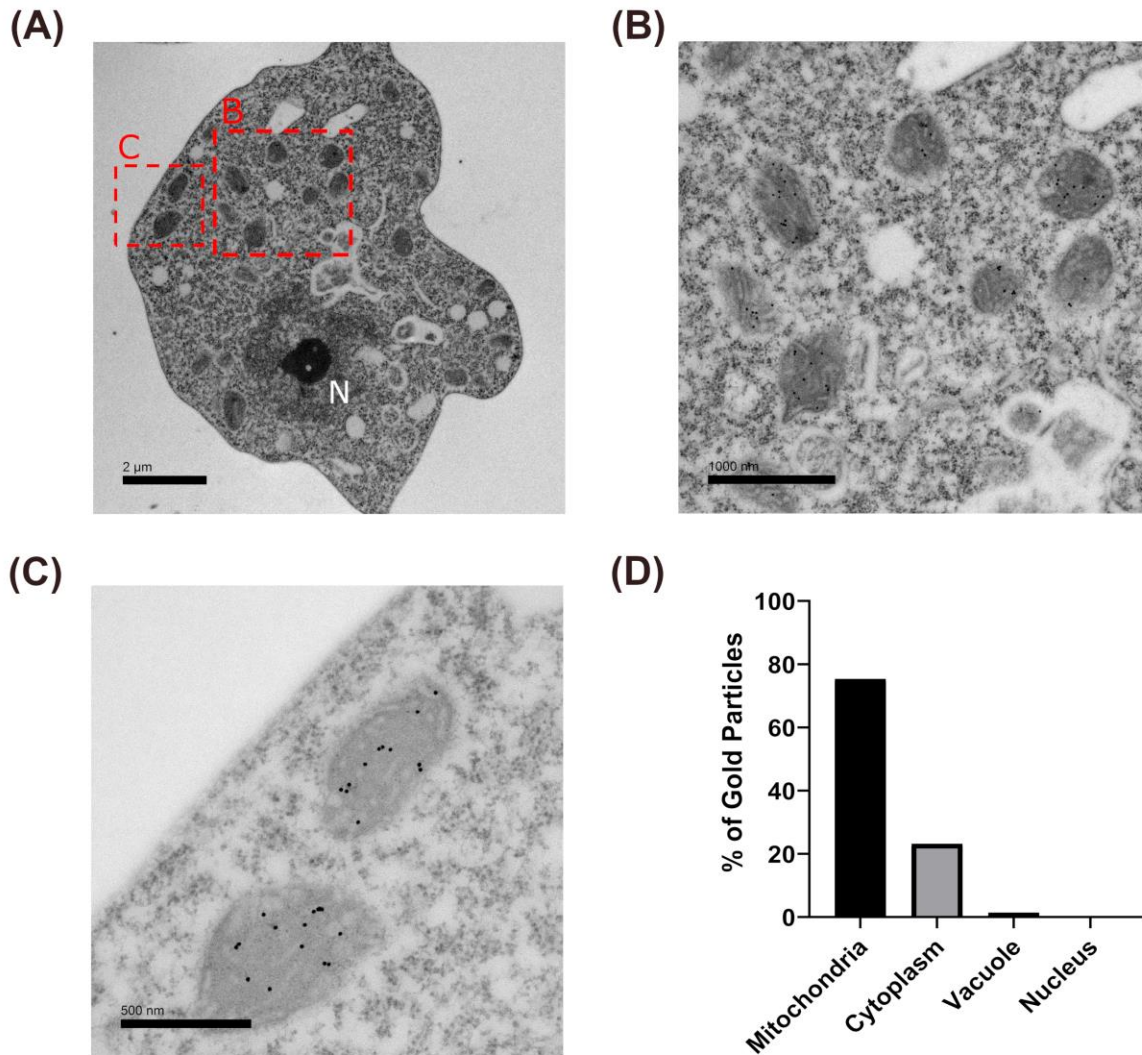

544  
545 **Figure 4. Immunoelectron microscopy reveals AOX localization within the inner**  
546 **mitochondrial membrane.**

547 Fixed *N. gruberi* samples were probed for IEM to assess their localization in the mitochondria. The  
548 AOX signal derived by the immunogold secondary antibodies bound against AOX primary  
549 antibodies localizes predominantly inside the mitochondria.

550  
551  
552  
553

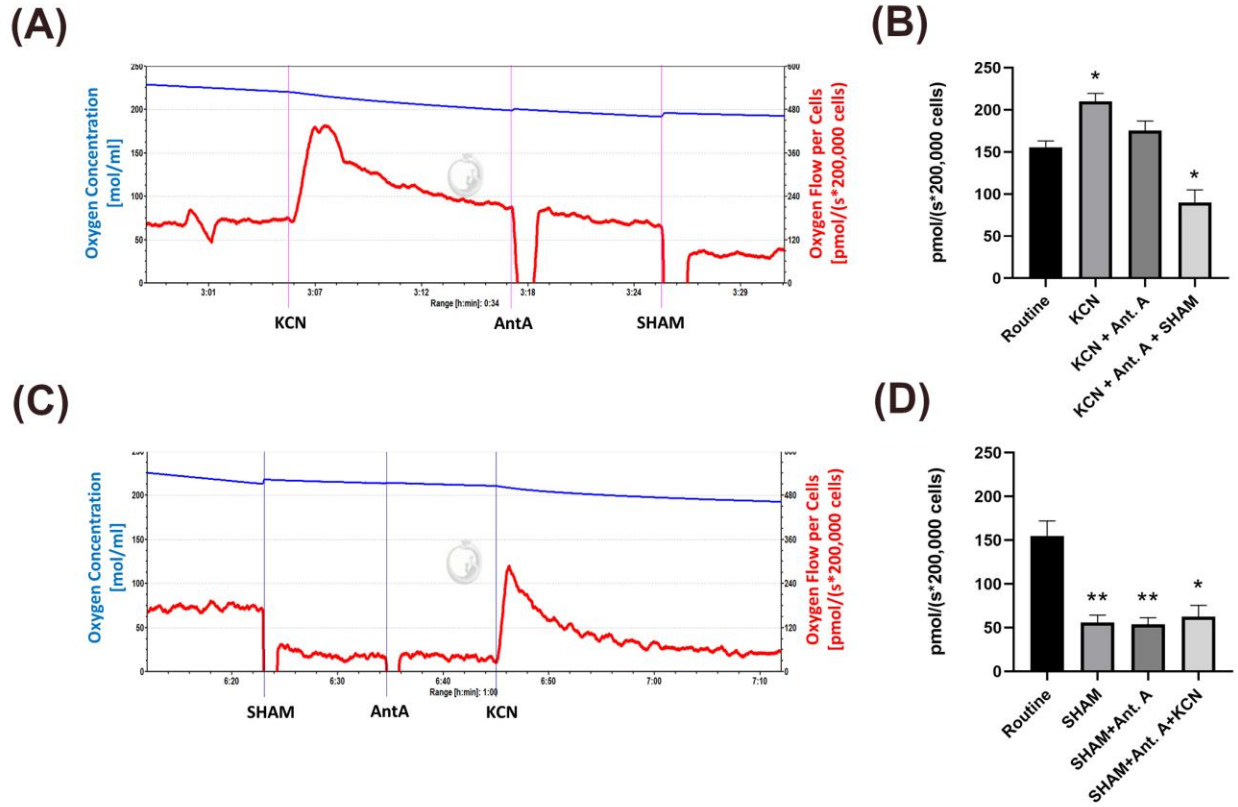

554 **Figure 5. High resolution real-time respirometry reveals cyanide resistant respiration.**  
 555 *N. gruberi* cells were subjected to real-time respirometry in the presence of metabolic inhibitors to  
 556 assess respiration. Cells were added to the chambers without the presence of inhibitors to assess  
 557 normal respiration, followed by the addition of a mitochondrial complex inhibitor. The order of  
 558 inhibitors were KCN (complex IV inhibitor) followed by Antamycin A (complex III inhibitor) and  
 559 SHAM (AOX inhibitor) (A). The experiments were then completed in reverse order (B). KCN did  
 560 not display decreases in respiration, whereas SHAM significantly reduced respiration. P values; \*  
 561 <0.05, \*\*<0.01

562  
563  
564  
565  
566  
567  
568  
569  
570  
571  
572  
573  
574  
575  
576  
577  
578



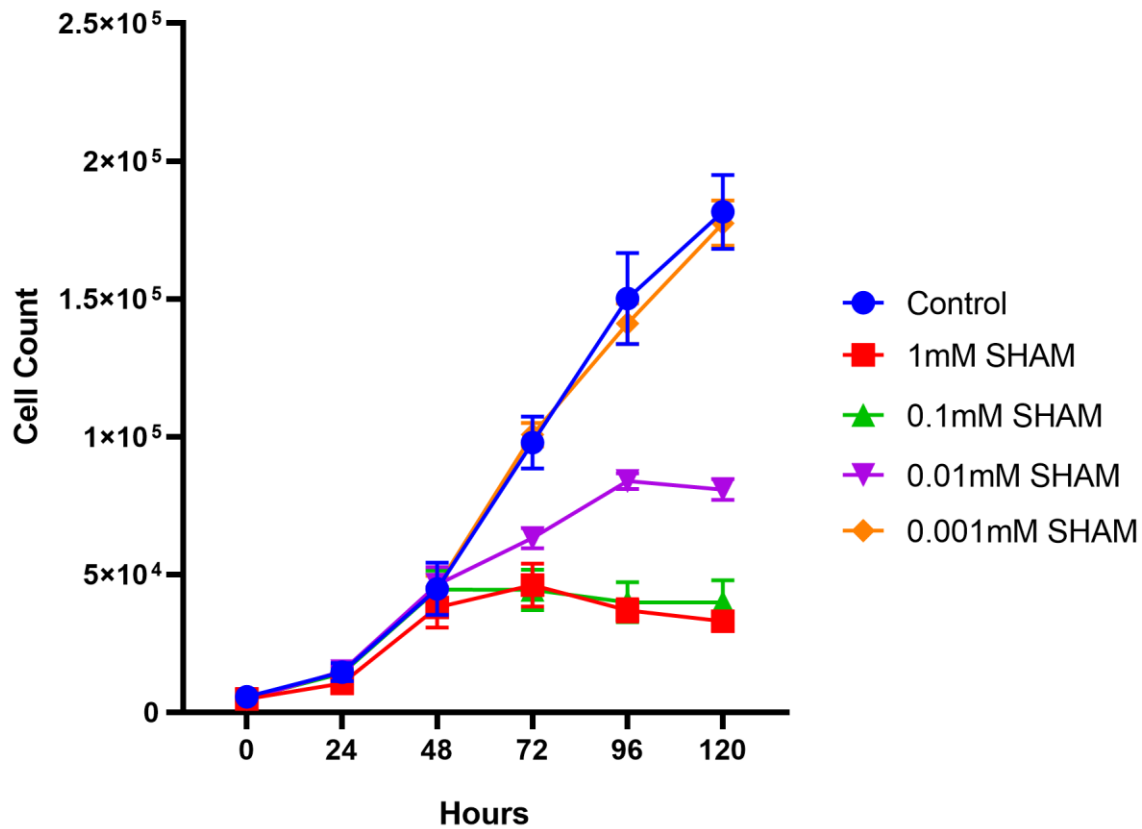

579  
580  
581  
582  
583  
584  
585  
586  
587  
588  
589  
590  
591  
592  
593  
594  
595  
596  
597  
598  
599  
600  
601

**Figure 6. Growth of *N. gruberi* is reduced in increasing concentrations of SHAM.**

Using the JuLI™Stage Live cell monitoring system, we were able to monitor the growth rates of *N. gruberi* cells in varying concentrations of SHAM. Cells were seeded in wells of a 96-well plate and left to grow for 48 hours prior to the addition of SHAM at 1mM, 0.1mM, 0.01mM and 0.001mM concentration. By counting cells, we noticed a significant decrease in cell numbers when challenged with 1 mM and 0.1mM SHAM. In the presence of 0.01mM SHAM we saw a decrease in proliferation rate, peaking at 96 hours. We observed no effect using SHAM at 0.001mM. Error bars are standard error of the mean.

602 **Supplementary Figures**

603

604 **Supplementary Figure S1. Sequence alignments of AOX reveals conserved domains**

605 Maximum likelihood tree of AOX homologs in eukaryotes and bacteria (323 sequences, 148 amino  
606 acid positions). The tree was inferred with IQTREE using the LG+I+G4 model selected under the  
607 BIC criterion. Grey dots correspond to supports higher than 80%. The scale bar corresponds to the  
608 average number of substitutions per site.

609

610 **Supplementary Figure S2. Sequence alignments of AOX reveals conserved domains**

611 To assess level of conservation between AOXs we aligned ngAOX, nfAOX and nlAOX amino acid  
612 sequences against other well characterized AOXs; *Trypanosoma brucei*, *Candida albicans*,  
613 *Arabidopsis thaliana*, *Cryptosporidium parvum* and, *Neurospora crassa*. We observed a  
614 considerable amount of conservation between all AOXs towards the middle and C-terminal end,  
615 where the presence of the alpha helical bundles and di-iron binding domains reside. \* denotes key  
616 amino acids presented in Table below. † denotes a deviation in conserved amino acids of AOX

617

618 **Supplementary Figure S3. Confocal microscopy demonstrating mitochondrial localization of**  
619 **AOX.**

620 Additional *N. gruberi* cells demonstrating localization of AOX in their mitochondria. *N. gruberi*  
621 cells were treated with mitotracker red prior to fixation and then probed with AOX antibodies  
622 (green). Nuclear marker and mtDNA staining is shown in blue (DAPI staining) Our confocal  
623 imaging reveals a high degree of co-localization between the mitotracker red signal and the green  
624 signal derived from immunoprobng AOX.

625

626

627 **LITERATURE CITED**

628

629 Adl, S. M. *et al.* (2019) ‘Revisions to the Classification, Nomenclature, and Diversity of  
630 Eukaryotes’, *Journal of Eukaryotic Microbiology*. doi: 10.1111/jeu.12691.

631 Barsottini, M. R. O. *et al.* (2020) ‘Biochemical characterization and inhibition of the alternative  
632 oxidase enzyme from the fungal phytopathogen *Moniliophthora perniciosa*’, *Communications*  
633 *Biology*. doi: 10.1038/s42003-020-0981-6.

634 Berthold, D. A., Andersson, M. E. and Nordlund, P. (2000) ‘New insight into the structure and  
635 function of the alternative oxidase’, *Biochimica et Biophysica Acta - Bioenergetics*, 1460(2–3), pp.  
636 241–254. doi: 10.1016/S0005-2728(00)00149-3.

637 Bexkens, M. L. *et al.* (2018) ‘Lipids Are the Preferred Substrate of the Protist *Naegleria gruberi*,  
638 Relative of a Human Brain Pathogen’, *Cell Reports*, 25(3), pp. 537-543.e3. doi:  
639 10.1016/j.celrep.2018.09.055.

640 Chalmers, R. M. (2014) ‘Chapter Twenty - *Naegleria*’, in Percival, S. L. *et al.* (eds). London:  
641 Academic Press, pp. 407–416. doi: <https://doi.org/10.1016/B978-0-12-415846-7.00020-2>.

642 Choi, W. T. *et al.* (2018) ‘Metabolomics of mammalian brain reveals regional differences’, *BMC*  
643 *Systems Biology*. doi: 10.1186/s12918-018-0644-0.

644 Cichocka, M. and Bereś, A. (2018) ‘From fetus to older age: A review of brain metabolic changes  
645 across the lifespan’, *Ageing Research Reviews*. doi: 10.1016/j.arr.2018.05.005.

- 646 Clarkson, A. B. *et al.* (1989) 'Respiration of bloodstream forms of the parasite *Trypanosoma brucei*  
647 *brucei* is dependent on a plant-like alternative oxidase', *Journal of Biological Chemistry*.
- 648 Crichton, P. G. *et al.* (2010) 'Mutagenesis of the *Sauromatum guttatum* alternative oxidase reveals  
649 features important for oxygen binding and catalysis', *Biochimica et Biophysica Acta - Bioenergetics*.  
650 doi: 10.1016/j.bbabi.2009.12.010.
- 651 Criscuolo, A. and Gribaldo, S. (2010) 'BMGE (Block Mapping and Gathering with Entropy): A new  
652 software for selection of phylogenetic informative regions from multiple sequence alignments',  
653 *BMC Evolutionary Biology*. doi: 10.1186/1471-2148-10-210.
- 654 Duvenage, L., Munro, C. A. and Gourlay, C. W. (2019) 'The potential of respiration inhibition as a  
655 new approach to combat human fungal pathogens', *Current Genetics*, 65(6), pp. 1347–1353. doi:  
656 10.1007/s00294-019-01001-w.
- 657 Ebiloma, G. U. *et al.* (2019) 'Alternative oxidase inhibitors: Mitochondrion-targeting as a strategy  
658 for new drugs against pathogenic parasites and fungi', *Medicinal Research Reviews*. doi:  
659 10.1002/med.21560.
- 660 Ferreira, A. L. *et al.* (2008) 'Induction of alternative oxidase chain under salt stress conditions',  
661 *Biologia Plantarum*. doi: 10.1007/s10535-008-0009-4.
- 662 Finnegan, P. M., Soole, K. L. and Umbach, A. L. (2004) 'Alternative Mitochondrial Electron  
663 Transport Proteins in Higher Plants', in. doi: 10.1007/978-1-4020-2400-9\_9.
- 664 Fritz-Laylin, L. K. *et al.* (2010) 'The Genome of *Naegleria gruberi* Illuminates Early Eukaryotic  
665 Versatility', *Cell*. doi: 10.1016/j.cell.2010.01.032.
- 666 Fritz-Laylin, L. K. *et al.* (2011) 'The *Naegleria* genome: A free-living microbial eukaryote lends  
667 unique insights into core eukaryotic cell biology', *Research in Microbiology*. doi:  
668 10.1016/j.resmic.2011.03.003.
- 669 Gardner, B. *et al.* (2017) 'Metal concentrations and distributions in the human olfactory bulb in  
670 Parkinson's disease', *Scientific Reports*. doi: 10.1038/s41598-017-10659-6.
- 671 Ginger, M. L. *et al.* (2010) 'Intermediary Metabolism in Protists: A Sequence-based View of  
672 Facultative Anaerobic Metabolism in Evolutionarily Diverse Eukaryotes', *Protist*. doi:  
673 10.1016/j.protis.2010.09.001.
- 674 Herman, E. K. *et al.* (2018) 'Identification and characterisation of a cryptic Golgi complex in  
675 *Naegleria gruberi*', *Journal of Cell Science*. doi: 10.1242/jcs.213306.
- 676 Herman, E. K. *et al.* (2020) 'A comparative 'omics approach to candidate pathogenicity factor  
677 discovery in the brain-eating amoeba *Naegleria fowleri*', *bioRxiv*, p. 2020.01.16.908186. doi:  
678 10.1101/2020.01.16.908186.
- 679 Johnson, L. S., Eddy, S. R. and Portugaly, E. (2010) 'Hidden Markov model speed heuristic and  
680 iterative HMM search procedure', *BMC Bioinformatics*. doi: 10.1186/1471-2105-11-431.
- 681 De Jonckheere, J. F. (1979) 'Occurrence of *Naegleria* and *Acanthamoeba* in aquaria', *Applied and  
682 Environmental Microbiology*. doi: 10.1128/aem.38.4.590-593.1979.
- 683 De Jonckheere, J. F. *et al.* (2001) 'The amoeba-to-flagellate transformation test is not reliable for the  
684 diagnosis of the genus *Naegleria*. Description of three new *Naegleria* spp.', *Protist*. doi:  
685 10.1078/1434-4610-00049.

- 686 De Jonckheere, J. F. (2014) ‘What do we know by now about the genus *Naegleria*?’, *Experimental*  
687 *Parasitology*. doi: 10.1016/j.exppara.2014.07.011.
- 688 Katoh, K. and Standley, D. M. (2013) ‘MAFFT multiple sequence alignment software version 7:  
689 Improvements in performance and usability’, *Molecular Biology and Evolution*. doi:  
690 10.1093/molbev/mst010.
- 691 Kelley, L. A. *et al.* (2015) ‘The Phyre2 web portal for protein modeling, prediction and analysis’,  
692 *Nature Protocols*. doi: 10.1038/nprot.2015.053.
- 693 Koonin, E. V. (2010) ‘The Incredible Expanding Ancestor of Eukaryotes’, *Cell*. doi:  
694 10.1016/j.cell.2010.02.022.
- 695 Mach, J. *et al.* (2018) ‘Iron economy in *Naegleria gruberi* reflects its metabolic flexibility’,  
696 *International Journal for Parasitology*. doi: 10.1016/j.ijpara.2018.03.005.
- 697 Mhadhbi, H. *et al.* (2013) ‘Alternative oxidase 1 (Aox1) gene expression in roots of *Medicago*  
698 *truncatula* is a genotype-specific component of salt stress tolerance’, *Journal of Plant Physiology*.  
699 doi: 10.1016/j.jplph.2012.08.017.
- 700 Moore, A. L. *et al.* (2013) ‘Unraveling the Heater: New Insights into the Structure of the Alternative  
701 Oxidase’, *Annual Review of Plant Biology*, 64(1), pp. 637–663. doi: 10.1146/annurev-arplant-  
702 042811-105432.
- 703 Moore, A. L. and Albury, M. S. (2008) ‘Further insights into the structure of the alternative oxidase:  
704 From plants to parasites’, in *Biochemical Society Transactions*. doi: 10.1042/BST0361022.
- 705 Moseman, E. A. (2020) ‘Battling brain-eating amoeba: Enigmas surrounding immunity to *Naegleria*  
706 *fowleri*’, *PLOS Pathogens*, 16(4), p. e1008406. doi: 10.1371/journal.ppat.1008406.
- 707 Murphy, A. D. and Lang-Unnasch, N. (1999) ‘Alternative oxidase inhibitors potentiate the activity  
708 of atovaquone against *Plasmodium falciparum*’, *Antimicrobial Agents and Chemotherapy*. doi:  
709 10.1128/aac.43.3.651.
- 710 Nguyen, L. T. *et al.* (2015) ‘IQ-TREE: A fast and effective stochastic algorithm for estimating  
711 maximum-likelihood phylogenies’, *Molecular Biology and Evolution*. doi: 10.1093/molbev/msu300.
- 712 Özugur, S., Kunz, L. and Straka, H. (2020) ‘Relationship between oxygen consumption and  
713 neuronal activity in a defined neural circuit’, *BMC Biology*. doi: 10.1186/s12915-020-00811-6.
- 714 Pennisi, R. *et al.* (2016) ‘Molecular Evolution of Alternative Oxidase Proteins: A Phylogenetic and  
715 Structure Modeling Approach’, *Journal of Molecular Evolution*, 82(4–5), pp. 207–218. doi:  
716 10.1007/s00239-016-9738-8.
- 717 Roberts, C. W. *et al.* (2004) ‘Evidence for mitochondrial-derived alternative oxidase in the  
718 apicomplexan parasite *Cryptosporidium parvum*: A potential anti-microbial agent target’,  
719 *International Journal for Parasitology*. doi: 10.1016/j.ijpara.2003.11.002.
- 720 Saha, B., Borovskii, G. and Panda, S. K. (2016) ‘Alternative oxidase and plant stress tolerance’,  
721 *Plant signaling & behavior*. doi: 10.1080/15592324.2016.1256530.
- 722 Schuster, F. L. (2002) ‘Cultivation of pathogenic and opportunistic free-living amebas’, *Clinical*  
723 *Microbiology Reviews*. doi: 10.1128/CMR.15.3.342-354.2002.
- 724 Shiba, T. *et al.* (2013) ‘Structure of the trypanosome cyanide-insensitive alternative oxidase’,  
725 *Proceedings of the National Academy of Sciences of the United States of America*. doi:

- 726 10.1073/pnas.1218386110.
- 727 Sievers, F. *et al.* (2011) ‘Fast, scalable generation of high-quality protein multiple sequence  
728 alignments using Clustal Omega’, *Molecular Systems Biology*. doi: 10.1038/msb.2011.75.
- 729 Stechmann, A. *et al.* (2008) ‘Organelles in *Blastocystis* that Blur the Distinction between  
730 Mitochondria and Hydrogenosomes’, *Current Biology*. doi: 10.1016/j.cub.2008.03.037.
- 731 Tsaousis, A. D. *et al.* (2014) ‘A Nonmitochondrial hydrogen production in *Naegleria gruberi*’,  
732 *Genome Biology and Evolution*. doi: 10.1093/gbe/evu065.
- 733 Tsaousis, A. D. *et al.* (2018) ‘The Human Gut Colonizer *Blastocystis* Respires Using Complex II  
734 and Alternative Oxidase to Buffer Transient Oxygen Fluctuations in the Gut’, *Frontiers in cellular  
735 and infection microbiology*. doi: 10.3389/fcimb.2018.00371.
- 736 Tysl, T. *et al.* (2016) ‘Heterolobosean amoebae from Arctic and Antarctic extremes: 18 novel  
737 strains of *Allovahlkampfia*, *Vahlkampfia* and *Naegleria*’, *European Journal of Protistology*. doi:  
738 10.1016/j.ejop.2016.08.003.
- 739 Vanlerberghe, G. C. (2013a) ‘Alternative oxidase: A mitochondrial respiratory pathway to maintain  
740 metabolic and signaling homeostasis during abiotic and biotic stress in plants’, *International Journal  
741 of Molecular Sciences*. doi: 10.3390/ijms14046805.
- 742 Vanlerberghe, G. C. (2013b) ‘Alternative oxidase: A mitochondrial respiratory pathway to maintain  
743 metabolic and signaling homeostasis during abiotic and biotic stress in plants’, *International Journal  
744 of Molecular Sciences*. doi: 10.3390/ijms14046805.
- 745 Vassella, E. *et al.* (2004) ‘Expression of a major surface protein of *Trypanosoma brucei* insect forms  
746 is controlled by the activity of mitochondrial enzymes’, *Molecular Biology of the Cell*. doi:  
747 10.1091/mbc.E04-04-0341.
- 748 Waterhouse, A. M. *et al.* (2009) ‘Jalview Version 2-A multiple sequence alignment editor and  
749 analysis workbench’, *Bioinformatics*. doi: 10.1093/bioinformatics/btp033.
- 750 Yan, L. *et al.* (2009) ‘The alternative oxidase of *Candida albicans* causes reduced fluconazole  
751 susceptibility’, *Journal of Antimicrobial Chemotherapy*. doi: 10.1093/jac/dkp273.
- 752
- 753
- 754
- 755
- 756
